# Supplementary material
Source: PubMed Central journal article supplement (PMC9742325)
Supplement: NIHMS1846133-supplement-7.pdf [file NIHMS1846133-supplement-7.pdf]

**Table S1: Plasma IgM neutralization of ZIKV. Related to Figure 1.**

| ZIKV+ Subject ID                                                      | Maternal Serostatus | Days post symptoms | Sample type | IgM concentration (ug/mL) | Zika binding IgG (ED50) | ZIKV Neutralization (FRNT50) | Normalized ZIKV neutralization attributable to IgM (%) |
|-----------------------------------------------------------------------|---------------------|--------------------|-------------|---------------------------|-------------------------|------------------------------|--------------------------------------------------------|
| 56                                                                    | 2° ZIKV             | 14                 | IgM dep     | <LOD                      | 9433                    | 3120                         | 17                                                     |
|                                                                       |                     |                    | Mock dep    | 62                        | 11564                   | 4594                         |                                                        |
| 54                                                                    | 1° ZIKV             | 36                 | IgM dep     | <LOD                      | 168.2                   | 132.1                        | 49                                                     |
|                                                                       |                     |                    | Mock dep    | 113                       | 198.1                   | 303                          |                                                        |
| 50                                                                    | 2° ZIKV             | 36                 | IgM dep     | <LOD                      | 4304                    | 412.4                        | 19                                                     |
|                                                                       |                     |                    | Mock dep    | NA                        | 2596                    | 307.6                        |                                                        |
| 50                                                                    | 2° ZIKV             | 71                 | IgM dep     | <LOD                      | 3048                    | 341.3                        | 29                                                     |
|                                                                       |                     |                    | Mock dep    | 100                       | 2261                    | 357.4                        |                                                        |
| 54                                                                    | 1° ZIKV             | 77                 | IgM dep     | <LOD                      | 359.9                   | 859.4                        | 37                                                     |
|                                                                       |                     |                    | Mock dep    | 65                        | 414.6                   | 1582                         |                                                        |
| 17                                                                    | 2° ZIKV             | 166                | IgM dep     | <LOD                      | 1365                    | 400.5                        | 0                                                      |
|                                                                       |                     |                    | Mock dep    | 34                        | 2923                    | 690.9                        |                                                        |
| 15                                                                    | 2° ZIKV             | 178                | IgM dep     | <LOD                      | 3977                    | 3172                         | 4                                                      |
|                                                                       |                     |                    | Mock dep    | 26                        | 4000                    | 3335                         |                                                        |
| 24                                                                    | 1° ZIKV             | 186                | IgM dep     | <LOD                      | 817                     | 1479                         | 0                                                      |
|                                                                       |                     |                    | Mock dep    | 97                        | 690.9                   | 1257                         |                                                        |
| 14                                                                    | 2° ZIKV             | 188                | IgM dep     | <LOD                      | 3402                    | 1322                         | 4                                                      |
|                                                                       |                     |                    | Mock dep    | 43                        | 3855                    | 1561                         |                                                        |
| 23                                                                    | 2° ZIKV             | 209                | IgM dep     | <LOD                      | 991.5                   | 1327                         | 28                                                     |
|                                                                       |                     |                    | Mock dep    | 80                        | 1869                    | 3492                         |                                                        |
| 19                                                                    | 2° ZIKV             | 251                | IgM dep     | <LOD                      | 1872                    | 577.5                        | 0                                                      |
|                                                                       |                     |                    | Mock dep    | 31                        | 2224                    | 629.6                        |                                                        |
| <b>Secondary ZIKV subject P73 with prolonged viremia in pregnancy</b> |                     |                    |             |                           |                         |                              |                                                        |
| 73                                                                    | 2° ZIKV             | 8                  | IgM dep     | <LOD                      | 14199                   | 182.8                        | 7                                                      |
|                                                                       |                     |                    | Mock dep    | 39                        | 17027                   | 234.7                        |                                                        |
|                                                                       |                     | 14                 | IgM dep     | <LOD                      | 14544                   | 290.3                        | 78                                                     |
|                                                                       |                     |                    | Mock dep    | 26                        | 14569                   | 1320                         |                                                        |
|                                                                       |                     | 28                 | IgM dep     | <LOD                      | 13457                   | 626.2                        | 30                                                     |
|                                                                       |                     |                    | Mock dep    | 26                        | 19377                   | 1297                         |                                                        |
|                                                                       |                     | 42                 | IgM dep     | <LOD                      | 13153                   | 232.7                        | 41                                                     |
|                                                                       |                     |                    | Mock dep    | 224                       | 17824                   | 538.3                        |                                                        |
|                                                                       |                     | 71                 | IgM dep     | NA                        | 7334                    | 1340                         | 52                                                     |
|                                                                       |                     |                    | Mock dep    | NA                        | 9564                    | 3623                         |                                                        |
|                                                                       |                     | 100                | IgM dep     | <LOD                      | 5983                    | 1315                         | 3                                                      |
|                                                                       |                     |                    | Mock dep    | 33                        | 5658                    | 1277                         |                                                        |
|                                                                       |                     | 112                | IgM dep     | <LOD                      | 10132                   | 1283                         | 14                                                     |
|                                                                       |                     |                    | Mock dep    | 18                        | 12293                   | 1804                         |                                                        |
|                                                                       |                     | 197                | IgM dep     | <LOD                      | 9754                    | 842                          | 0                                                      |
|                                                                       |                     |                    | Mock dep    | 21                        | 9432                    | 706.4                        |                                                        |
|                                                                       |                     | 289                | IgM dep     | <LOD                      | 6020                    | 392.5                        | 0                                                      |
|                                                                       |                     |                    | Mock dep    | 24                        | 18170                   | 708.3                        |                                                        |
| 406                                                                   | IgM dep             | <LOD               | 6852        | 1939                      | 0                       |                              |                                                        |
|                                                                       | Mock dep            | 532                | 10584       | 1903                      |                         |                              |                                                        |
