# Supplementary material
Source: PubMed Central journal article supplement (PMC9742325)
Supplement: NIHMS1846133-supplement-9.pdf [file NIHMS1846133-supplement-9.pdf]

**Table S3. Epitope and paratope residues within 6Å between the DH1017.Fab and E ectodomain fitted structures to the cryo-EM density map of the Fab-bound Zika virion. Related to Figure 6.**

Fab footprint conserved residues at i2f and q2f symmetry axes

| Residue number(s) | Amino Acid | Domain/chain /axis  |
|-------------------|------------|---------------------|
| 120-126           | ACSKKMT    | DII, A, C, i2f, q2f |
| 205,207,208       | T, N, N    | DII, A, C, i2f, q2f |
| 230-232           | DTG        | DII, A, C, i2f, q2f |
| 278-280           | DGA        | DII, A, C, i2f, q2f |

Fab footprint unique residues at i2f and q2f symmetry axes

| Residue number(s) | Amino Acid | Domain/chain /axis |
|-------------------|------------|--------------------|
| 61-66             | YEASIS     | DII, A, i2f        |
| 206,228,229       | M, G, A    | DII, A, i2f        |
| 277               | M          | DI, A, i2f         |
| 127,128           | G, K       | DII, C, q2f        |
| 233-235           | TPH        | DII, C, q2f        |
| 281               | K          | DI, E, q2f         |

Paratope footprint residues at i2f axis

| Residue number(s) | Amino Acid | Chain/region |
|-------------------|------------|--------------|
| 26-35             | GGSISSGDSY | VH, CDR1     |
| 54-59             | YYSGST     | VH, CDR2     |
| 75-77             | TSK        | VH, FR3      |
| 101-106           | VGDLRV     | VH, CDR3     |

Paratope footprint residues at q2f axis

| Residue number(s) | Amino Acid | Chain/region |
|-------------------|------------|--------------|
| 26-28             | GGG        | VH, CDR1     |
| 30-33             | SSGD       | VH, CDR1     |
| 75-78             | TSKN       | VH, FR3      |
| 101-106           | VGDLRV     | VH, CDR3     |
| 57, 58            | G, I       | VL, FR3      |
